# Supplementary material
Source: PubMed Central journal article supplement (PMC4695331)

**Supplementary Figure 1**

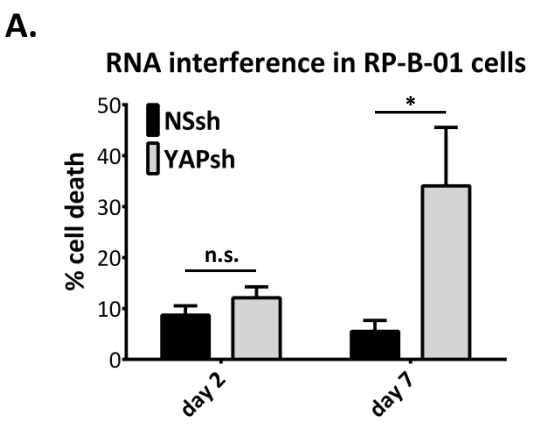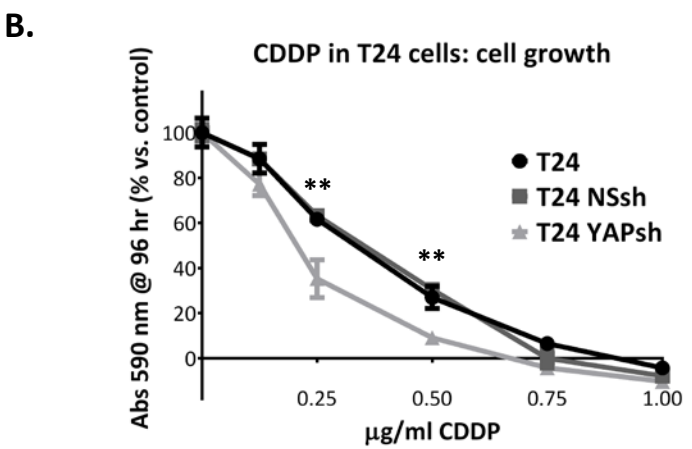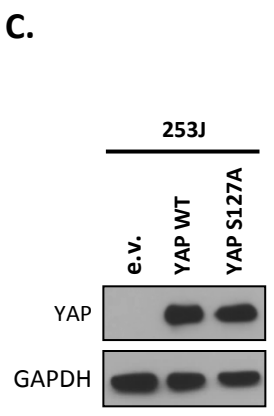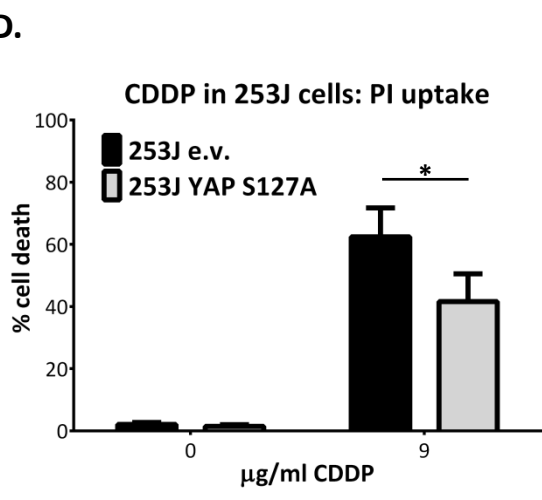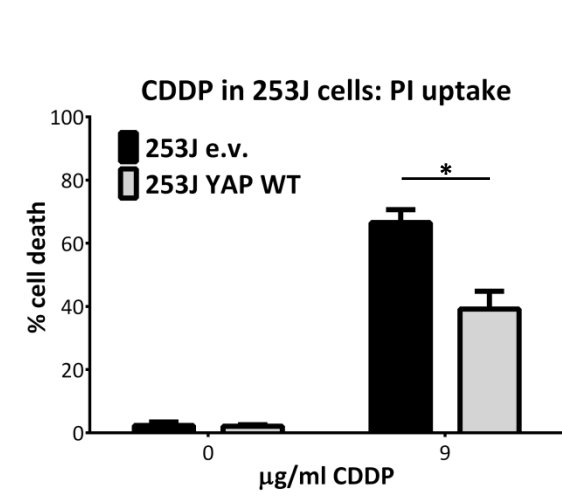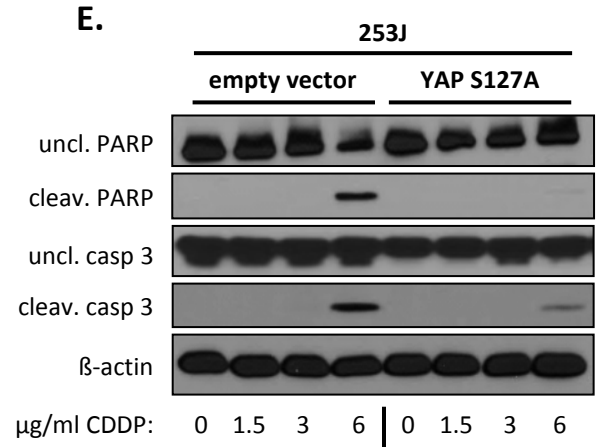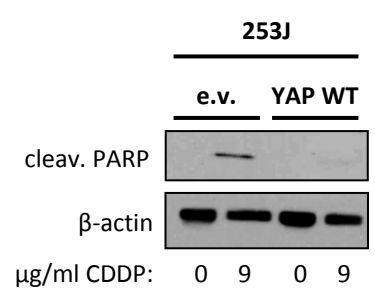

# Supplementary Figure 2

A.

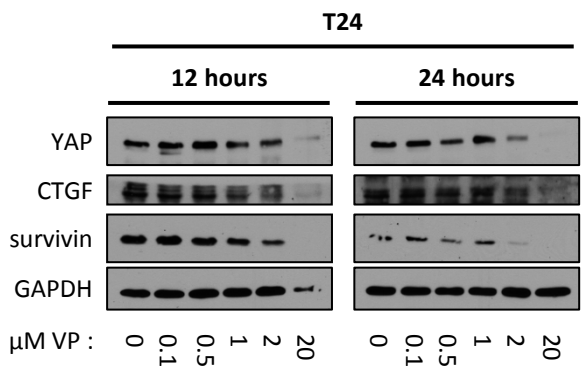

**Supplementary Figure 3**

**A.**

**Chemotherapy regimens in TMA**

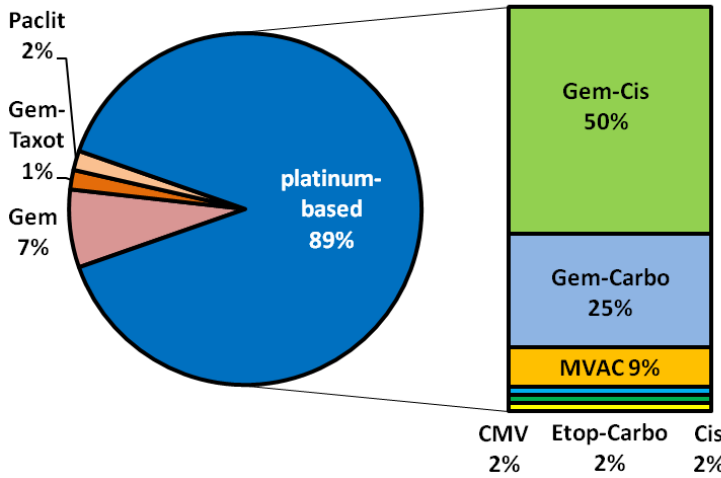

**B.**

| <u>Overall Survival</u> | Figure refer. | nuclear YAP | 1-yr Surv. Rate (95% CI) | 3-yr Surv. Rate (95% CI) | Median Surv. (95% CI) | log-rank p-value |
|-------------------------|---------------|-------------|--------------------------|--------------------------|-----------------------|------------------|
| All patients            | 7C            | High        | 0.67 (0.55, 0.77)        | 0.27 (0.17, 0.38)        | 19.1 (15.3, 24.5)     | < 0.001          |
|                         |               | Low         | 0.86 (0.78, 0.92)        | 0.59 (0.48, 0.68)        | 47.8 (35.3, 103.1)    |                  |
| Chemotherapy patients   | 7E            | High        | 0.83 (0.51, 0.96)        | 0.15 (0.02, 0.39)        | 19.6 (15.3, 24.5)     | 0.003            |
|                         |               | Low         | 0.83 (0.63, 0.92)        | 0.51 (0.32, 0.68)        | 37.8 (27.4, 89.7)     |                  |

| <u>Recurrence Free Survival</u> | Figure refer. | nuclear YAP | 1-yr RFS Rate (95% CI) | 3-yr RFS Rate (95% CI) | Median RFS (95% CI) | log-rank p-value |
|---------------------------------|---------------|-------------|------------------------|------------------------|---------------------|------------------|
| All patients                    | 7D            | High        | 0.52 (0.37, 0.66)      | 0.22 (0.11, 0.35)      | 12.9 (7.2, 20.6)    | < 0.001          |
|                                 |               | Low         | 0.79 (0.68, 0.86)      | 0.43 (0.32, 0.54)      | 28.8 (19.0, 55.7)   |                  |
| Chemotherapy patients           | 7F            | High        | 0.63 (0.23, 0.86)      | 0.00 (0.01, 0.42)      | 12.6 (5.4, 20.1)    | 0.021            |
|                                 |               | Low         | 0.73 (0.49, 0.87)      | 0.32 (0.14, 0.51)      | 23.8 (11.5, 55.7)   |                  |

# Supplementary Figure 4

A.

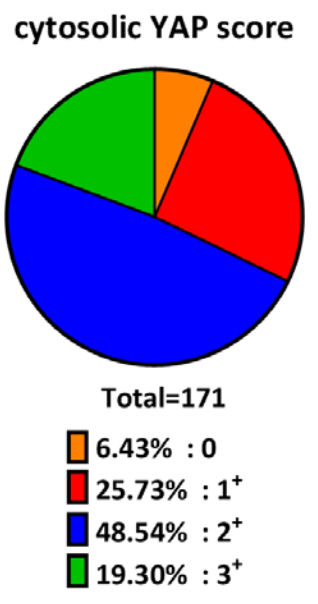

B.

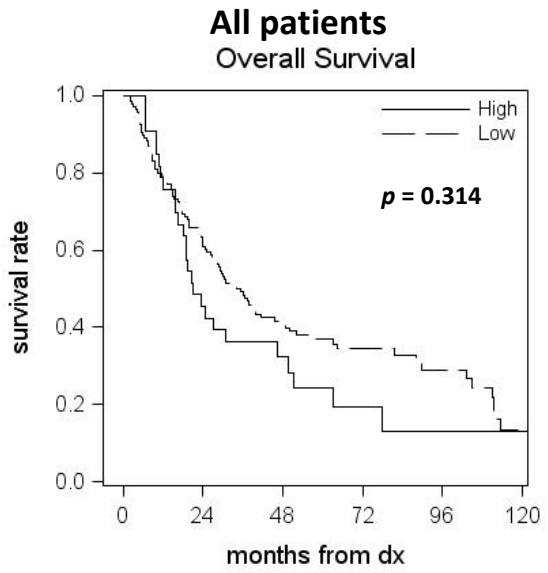

C.

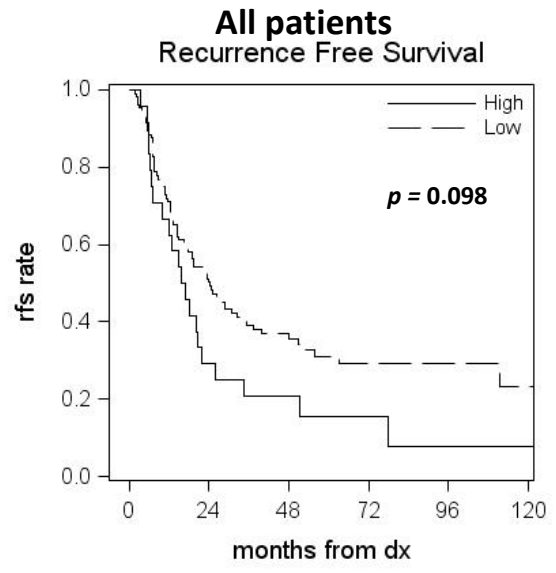

D.

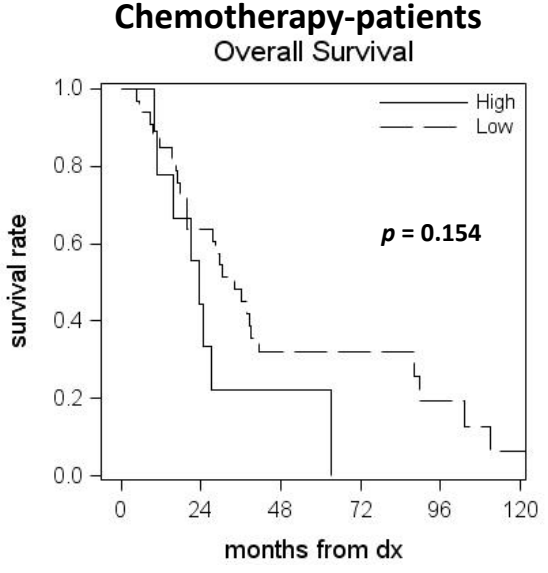

E.

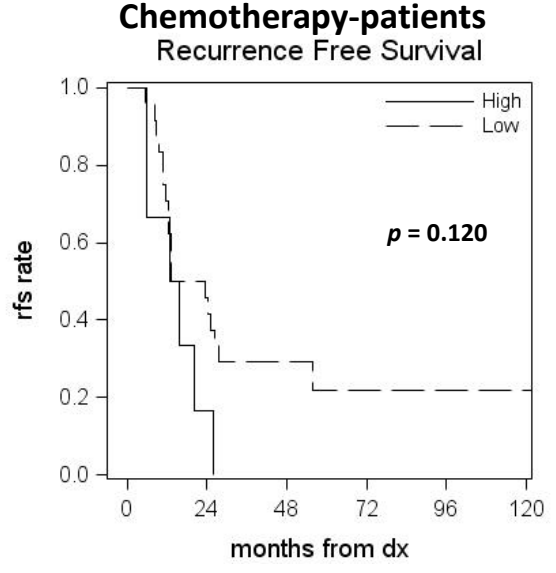

# Supplementary Figure 5

**A.**

## Cross-cancer alteration summary for Hippo pathway genes (25 TCGA provisional studies) (YAP1, TAZ, LATS1, LATS2, SAV1, MST1, STK3, NF2)

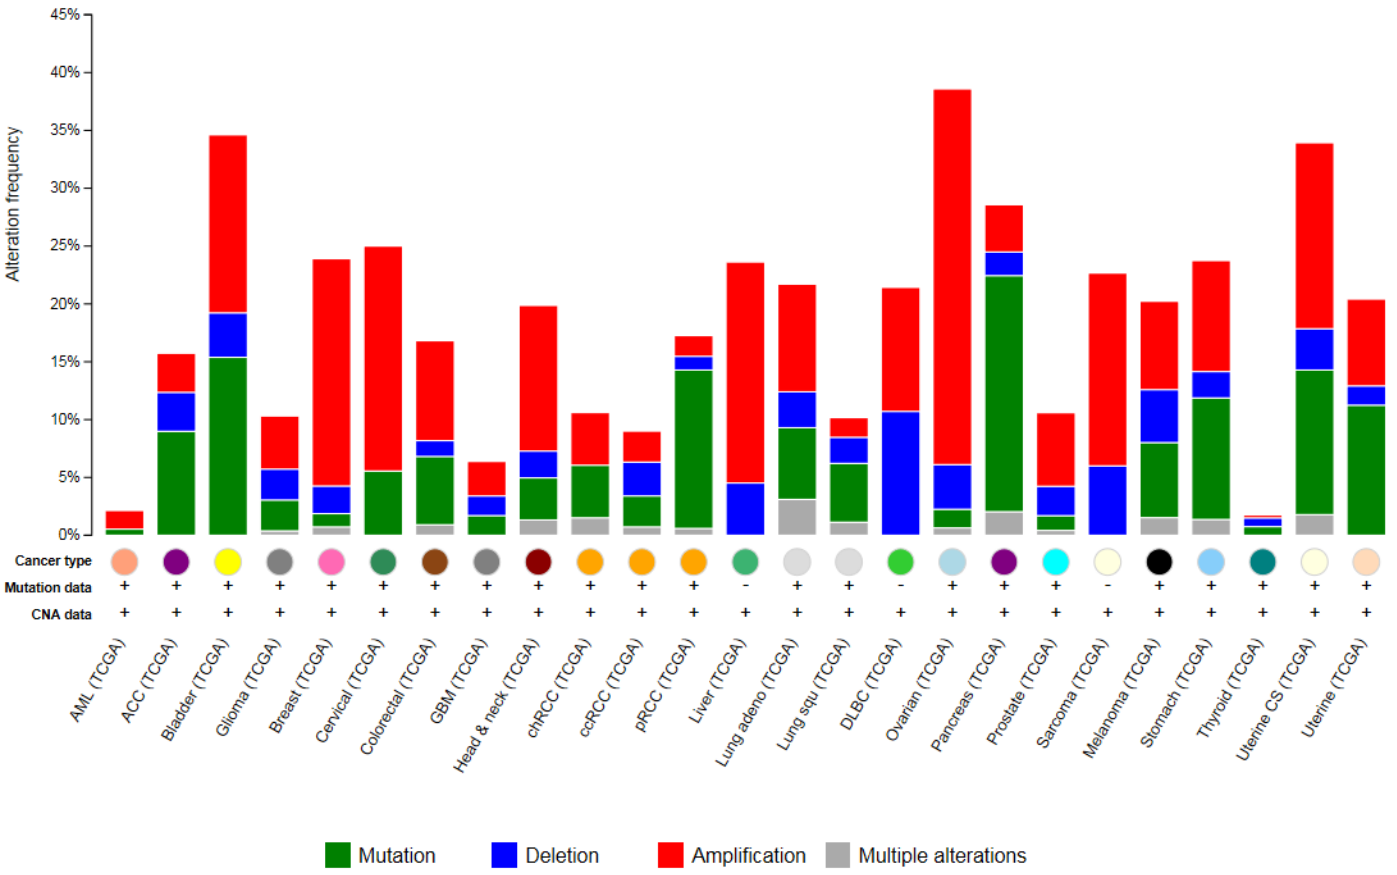

**B.**

## Cross-cancer alteration summary for YAP1 (25 TCGA provisional studies)

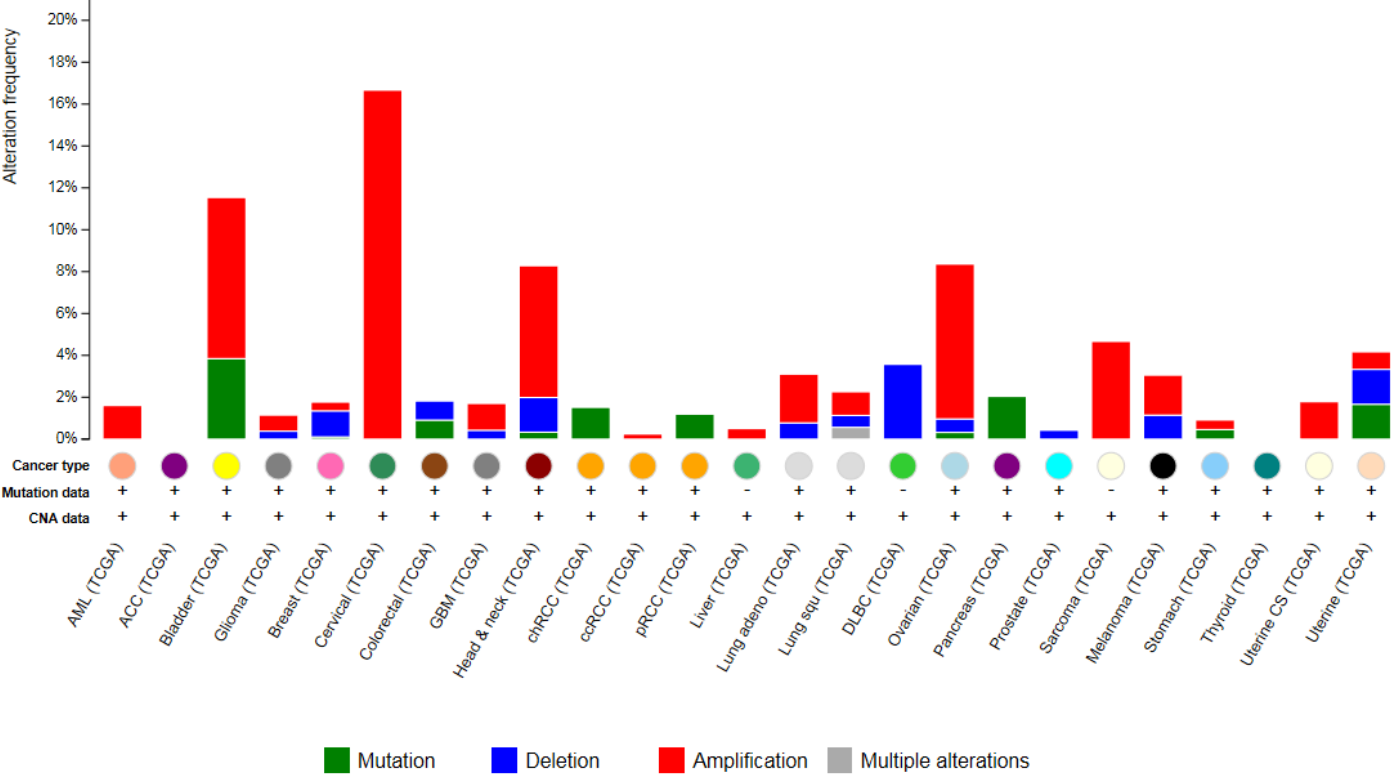

# Supplementary Figure 6

**A.**

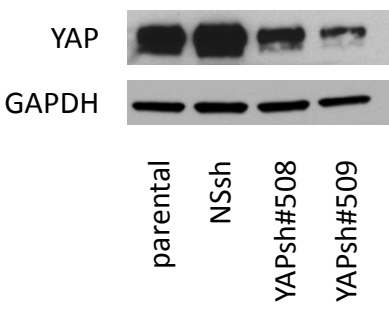

**B.**

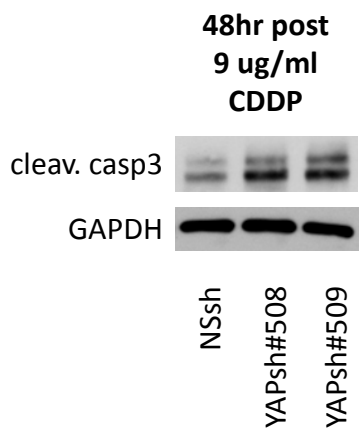

Supplement: NIHMS685789-supplement-2.pdf [file NIHMS685789-supplement-2.pdf]
